# Supplementary material for: New method for attachment of biomolecules to porous siliconElectronic supplementary information available. Experimental section. See http://www.rsc.org/suppdata/cc/b2/b209453c/
Source: Royal Society of Chemistry journal article supplement (doi:10.1039/b209453c), 2003-01-13
Supplement: b209453c.pdf [file b209453c.pdf]

## New Method for Attachment of Biomolecules to Porous Silicon

Bradley R. Hart, Sonia E. Létant, Staci R. Kane, Masood Z. Hadi,  
Sharon J. Shields, and John G. Reynolds\*

### SUPPORTING INFORMATION

#### *Etching of Silicon*

Porous silicon samples were electrochemically etched from monocrystalline n-type silicon substrates (phosphorus doped, 1-5  $\Omega$ .cm, (100) oriented, from Silicon Quest Inc.), for 5 min, at a current density of 90 mA/cm<sup>2</sup>, in a 1:1 (v/v) mixture of aqueous HF (49% hydrofluoric acid, Fisher Chemicals, Inc.) and ethanol (99.5% absolute ACS reagent grade, Sigma-Aldrich Inc.). The counter-electrode was a platinum ring, immersed in the electrolyte solution and the working electrode was contacted to the back of the Si wafer with In-Ga eutectic paste. All the samples used in this study were illuminated with the unfiltered light from a 150W halogen bulb during the electrochemical etching procedure in order to photo-generate the positive charges required to dissolve silicon in the presence of HF. After etching, the eutectic back contact was removed; the samples were rinsed in three 20 ml portions of absolute ethanol and immediately placed under vacuum to avoid air born contamination.

#### *Hydrosilylation of Porous Silicon*

Hydrosilylation of porous silicon samples with an area of 0.95 cm<sup>2</sup> were carried out in a round-bottom Schlenk type flask equipped with a single 24/40 taper joint and glass stopcock controlled side-arm. The silicon sample was placed in the flask and which was then sealed with a septum and purged with dry, oxygen-free nitrogen gas. 5-Hexynenitrile (0.10 mL, 0.95 mM) was added to the porous silicon surface followed by the addition of a 1.0 M hexane solution of EtAlCl<sub>2</sub> (150  $\mu$ L, 0.15 mmol). After 2 h at room temperature, the silicon surface was washed under a nitrogen atmosphere with THF, followed by CH<sub>2</sub>Cl<sub>2</sub> and then EtOH. The wafer was then dried under vacuum.

#### *Reduction of Surface Bound Nitrile*

Reduction of the surface bound nitrile to a 1° amine was achieved by adding a 1.0 M diethyl ether solution of LiAlH<sub>4</sub> (150  $\mu$ L, 0.15 mmol) to the surface of the porous silicon. After 30 min at room temperature, the silicon surface was washed under a nitrogen atmosphere with THF (3 x 5 mL), followed by CH<sub>2</sub>Cl<sub>2</sub> (3 x 5 mL) then ethanol (3 x 5 mL) then dried under a nitrogen stream followed by vacuum.

#### *Attachment of SPDP*

The amino functionalized porous silicon wafer was immersed in a solution of SPDP (2 mg, 6.4x10<sup>-3</sup> mmol) in 3:1 DMF/PBS (pH 7.2) under nitrogen. The wafer was left to react for 3 h with occasional agitation. The remaining SPDP solution was removed and the silicon wafer was rinsed with DMF (3 x 5 mL) followed by ethanol (3 x 5 mL) then dried under a nitrogen stream followed by vacuum.

#### *Reductive Cleavage of Pyridyl Disulfide Protecting Group*

The SPDP functionalized porous silicon wafer was immersed in a solution of dithiothreitol (DTT) (15.4 mg, 0.1 mmol) in 10% EtOH/H<sub>2</sub>O (10 mL). The wafer was left to react for 1 h with occasional agitation. The remaining DTT solution was removed and the wafer was rinsed with fresh 10% EtOH/H<sub>2</sub>O (3 × 5 mL) then EtOH (5 × 5 mL) then dried under a nitrogen stream followed by vacuum.

#### *Attachment of GMBS*

The sulfhydryl functionalized porous silicon wafer was immersed in a solution of GMBS (2.0 mg, 7.1 × 10<sup>-3</sup> mmol) in 3:1 DMF/PBS (pH 7.2) under nitrogen. The wafer was left to react for 3 h with occasional agitation. The remaining GMBS solution was removed and the silicon wafer was rinsed with DMF (3 × 5 mL) followed by ethanol (3 × 5 mL) then dried under a nitrogen stream followed by vacuum.

#### *Attachment of Biotin or Dansyl Fluorescent Probe*

The NHS-ester functionalized porous silicon wafer was immersed in a solution of Dansyl cadaverine (5.0 mg, 0.015 mmol) or Biotin cadaverine (5.0 mg, 0.011 mmol) in 1:1 DMF/PBS (pH 7.2) under nitrogen. The wafer was left to react for 3 h with occasional agitation. The remaining solution was removed and the silicon wafer was rinsed with DMF (5 × 5 mL) followed by ethanol (5 × 5 mL) then dried under a nitrogen stream followed by vacuum. Supplementary Material Spectrum 4 shows the FTIR of the biotin functionalized PSi.

#### *Attachment of Streptavidin*

To the surface of a Biotin functionalized PSi was added a solution of Streptavidin (0.3 mL, 1 mg/mL protein) in PBS (pH 7.2). After 1 h the excess protein solution was removed and the surface was washed extensively with PBS (pH 7.2).

#### *Photoluminescence Measurements*

Photoluminescence measurements were performed using the 325 nm line of a 10 mW He-Cd laser. The spot size on the PSi sample was 1 mm<sup>2</sup>. The signal was focused on the 10 μm × 2 mm slit of an Oriel monochromator equipped with a 1200 mm<sup>-1</sup> grating and was detected with a CCD analyzer. The spectral resolution of the set up is 1.5 nm. All the spectra were corrected from the instrumental response.

#### *Trypsin Digestion of Streptavidin*

The modified surface containing streptavidin was washed with 50mM NH<sub>4</sub>HCO<sub>3</sub> (pH 7.8) prior to addition of trypsin (20 μL of 0.01 μg/μL). The porous silicon was then held at 37°C for 12 hours to maintain protease activity. To extract the streptavidin peptide fragments resulting from the digest 1:1 CH<sub>3</sub>CN/H<sub>2</sub>O containing 0.1% TFA (100 μL) was applied to the surface followed by extraction with a pipette. The extracted volume was reduced by speed-vac to 10 μL to increase the peptide concentration. 1 μL was mixed with 3 μL of 7 mg/mL α-cyano-4-hydroxycinnamic acid and 6 μL of H<sub>2</sub>O and deposited on a stainless steel target for MALDI MS.

*Effect of Surface Modification on Photoluminescence*

Supplementary Materials Spectrum 3 shows the photoluminescence of the silicon surface before functionalization and after functionalization with biotin attached (structure 7). The reduction in photoluminescence is about 50%. The first functionalization step (the nitrile attachment), the photoluminescence is reduced this amount and remains unchanged after ensuing steps.

Spectrum 1. IR spectrum of nitrile functionalized PSi surface **1**.

Spectrum 2. MALDI-TOF MS spectrum of surface-bound Streptavidin Trypsin digest solution.

Spectrum 3. Porous silicon photoluminescence spectrum of freshly etched unfunctionalized surface and biotin link (structure 7)

Spectrum 4. FTIR of biotin functionalized PSi.
